# Supplementary material for: Review of Current Software for Analyzing Total X-ray Scattering Data from Liquids
Source: MDPI journal article supplement (doi:10.3390/qubs7020020), 2023-06-20
Supplement: s1 [file s1]

Archive with 1 entries (1 files):
- qubs-2406397-supplementary.pdf
